# Supplementary material
Source: PubMed Central journal article supplement (PMC2633386)

### Supplemental Figures:

#### Supplemental Figure 1: Variability in the pairing analysis illustrated for the *LYS2* and *LEU2* loci.

(A) Five independent experiments are shown analyzing pairing as described in Figure 1 in wild-type cells with homologous *LYS2* dots (A9828, closed squares) and wild-type cells with non-homologous *LYS2/URA3* dots (A9829, open squares), both deleted for *NDT80*.

(B) Five independent experiments are shown analyzing pairing as described in Figure 1 in wild-type cells with homologous *LEU2* dots (A5111, closed circles) and wild-type cells with non-homologous *LEU2/LYS2* dots (A11474, open circles), both deleted for *NDT80*.

#### Supplemental Figure 2: DSBs are essential for homolog pairing.

(A) Wild-type (A5111, black squares), *SPO11-HA/SPO11-HA* (A16376, dark blue squares), *spo11-D290A/spo11-D290A* (A16399, dark green squares), *SPO11-HA/spo11-Y135F* (A16391, light green squares) and *spo11-Y135F-HA/spo11-Y135F-HA* (A13346, yellow squares) cells all carrying homologous *LEU2* dots, and wild-type cells with non-homologous *LEU2/LYS2* dots (A11474, open squares), all deleted for *NDT80*, were assayed for pairing as described in Figure 1. The percentage of DSBs created by the various *spo11* alleles was determined by (Henderson and Keeney, 2004).

(B) Wild-type (A9828, black squares), *SPO11-HA/SPO11-HA* (A16292, dark blue squares), *spo11-D290A/spo11-D290A* (A16126, dark green squares), *SPO11-HA/spo11-Y135F* (A16147, light green squares) and *spo11-Y135F-HA/spo11-Y135F-HA* (A16133, yellow squares) cells all carrying homologous *LYS2* dots, and wild-type cells with non-homologous *LEU2/LYS2* dots (A11474, open squares), all deleted for *NDT80*, were assayed for pairing as described in Figure 1.

(C - E) Wild-type cells with homologous *LYS2* dots (A9828, black squares), *clb5Δ clb6Δ* cells with homologous *LYS2* dots (A11268, closed triangles) and wild-type cells with non-homologous *LEU2/LYS2* dots (A11474, open squares), all deleted for *NDT80*, were induced to sporulate. At the indicated time points, samples were assayed for pairing as described in Figure 1 (C) and DNA content analysis by flow cytometry (D, E).

(F - H) Wild-type cells with homologous *LEU2* dots (A5111, black squares), *clb5Δ clb6Δ* cells with homologous *LEU2* dots (A11326, closed triangles) and wild-type cells with non-homologous *LEU2/LYS2* dots (A11474, open squares), all deleted for *NDT80*, were induced to sporulate. At the indicated times, samples were taken and assayed for pairing as described in Figure 1 (F) and DNA content analysis by flow cytometry (G, H).

(I) Wild-type cells with homologous *LYS2* dots (A9828, closed squares), *mer2-S30A* cells with homologous *LYS2* dots (A16149, closed triangles), wild-type cells with non-homologous *URA3/LYS2* dots (A9829, open squares), all deleted for *NDT80*, were assayed for pairing as described in Figure 1.

**Supplemental Figure 3: Meiotic progression of strains in Figure 3.**

(A) Wild-type (A7097, closed squares), *spo11Δ* (A8477, closed triangles), *rec8Δ* (A16664, closed circles), *cdc6-mn* (A15880, open squares), *cdc6-mn rec8Δ* (A17021, open triangles), and *clb5Δ clb6Δ* (A16113, open circles) were induced to sporulate. At the indicated times, samples were taken to determine the percentage of cells with unassembled spindles.

(B) Wild-type (A1972, closed squares) and *scc3-mn* (A20163, closed triangles) were induced to sporulate. At the indicated times, samples were taken to determine the percentage of cells with unassembled spindles.

(C) *REC8-3HA* (A13946, closed squares), *pREC8-SCC1-3HA* (A16132, closed triangles), and *REC8-NC* (A13539, closed circles) were induced to sporulate. At the indicated times, samples were taken to determine the percentage of cells with unassembled spindles.

**Supplemental Figure 4: Zip1 categorization for strains analyzed in Figure 3B.**

Wild-type (A7097; A), *spo11* $\Delta$  (A8477; B), *rec8* $\Delta$  (A16664; C), *clb5* $\Delta$  *clb6* $\Delta$  (A16113; D), *cdc6-mn* (A15880; E), and *cdc6-mn rec8* $\Delta$  (A17021; F) were induced to sporulate. At the indicated times, cells were harvested and chromosome spreads were assayed for Zip1 staining according to the categories shown in Figure 3A. 100 mononucleate cells were counted per time point

**Supplemental Figure 5: Zip1 categorization for strains analyzed in Figure 3C.**

Wild-type (A1972, A) and *scc3-mn* (A20163, B) were induced to sporulate. At the indicated times, cells were harvested and chromosome spreads were assayed for Zip1 staining according to the categories shown in Figure 3A. 100 mononucleate cells were counted per time point.

**Supplemental Figure 6: Zip1 categorization for strains analyzed in Figure 3D.**

*REC8-3HA* (A13946; A), *pREC8-SCC1-3HA* (A16132; B), and *REC8-NC* (A13539; C) were induced to sporulate. At the indicated times, cells were harvested and chromosome spreads were assayed for Zip1 staining according to the categories shown in Figure 3A. 100 mononucleate cells were counted per time point.

**Supplemental Figure 7: Association of Hop1 with chromatin is not affected in *rec8-6A* and *rec8-29A* mutants.**

Wild-type (A20066), *rec8-29A* (A14385), and *rec8-6A* (A15042) cells were induced to sporulate. At 4 hours, cells were harvested and chromosome spreads were assayed for Hop1 staining. Representative “Full Hop1” cells are pictured for each strain. Hop1 is shown in green and DAPI is shown in blue.

**Supplemental Figure 8: Zip1 categorization for strains analyzed in Figure 7D, 7E**

Wild-type (A20066, A), *rec8Δ* (A3528, B), *rec8-29A* (A14385, C), and *rec8-6A* (A15042, D) cells were induced to sporulate. At the indicated times, cells were harvested and chromosome spreads were assayed for Zip1 staining according to the categories shown in Figure 3A. 100 mononucleate cells were counted per time point. counted per timepoint in A and C.

**Supplemental Figure 9: The Zip1 assembly defect is variable in *rec8-6A* mutants.**

A comparison of Zip1 assembly in independent experiments using wild-type (A20066), *rec8Δ* (A3528), and *rec8-6A* (A15042) cells. Zip1 staining is quantified in (B, D), the percentage of cells with unassembled meiotic spindles in (A, C). 100 mononucleate cells were counted per time point in B and D, 200 cells were counted per timepoint in A and C.

**Supplemental Figure 10: Zip1 categorization for strains analyzed in Figure 8A - F.**

Wild-type (A20066; A), *cdc5-mn* (A5844; B) cells and *rec8-psa* (A15364; D) cells and a corresponding wild-type (A14655; C) were induced to sporulate. At the indicated times, cells were harvested and chromosome spreads were assayed for Zip1 staining according to the categories shown in Figure 3A. 100 mononucleate cells were counted per time point.

**Supplemental Figure 11: The *rec8-6D* and *rec8-6E* proteins are not stable.**

Wild-type (A20066), *rec8-6D* (A20072) and *rec8-6E* (A20075) cells, all carrying HA-tagged versions of Rec8, were induced to sporulate. At 0 hours and 5 hours, cells were collected and Rec8-3HA levels were analyzed by Western blot analysis.  $\alpha$ -PGK blotting is included as a loading control.

**A**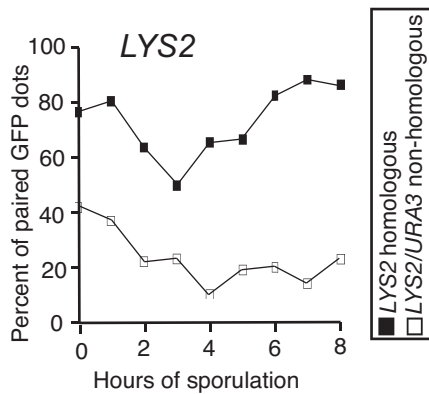**B**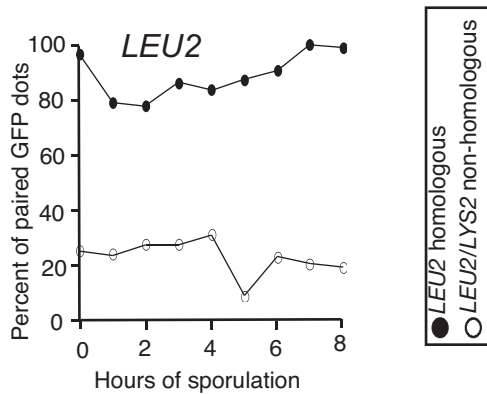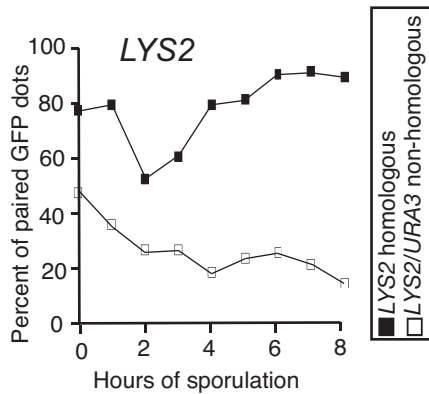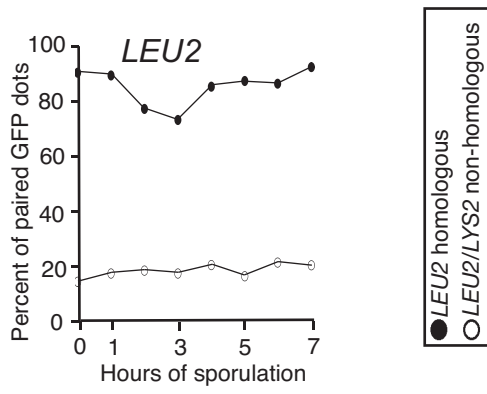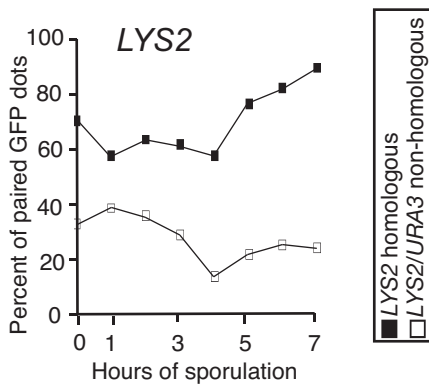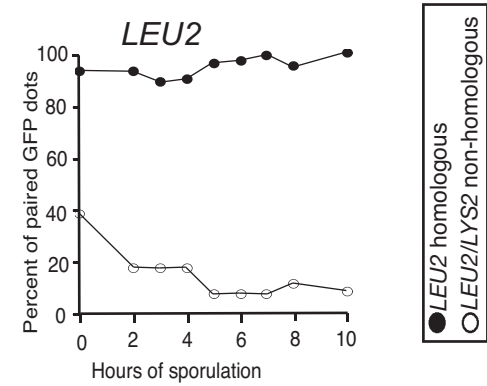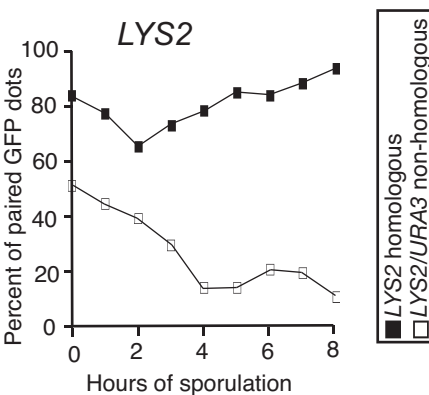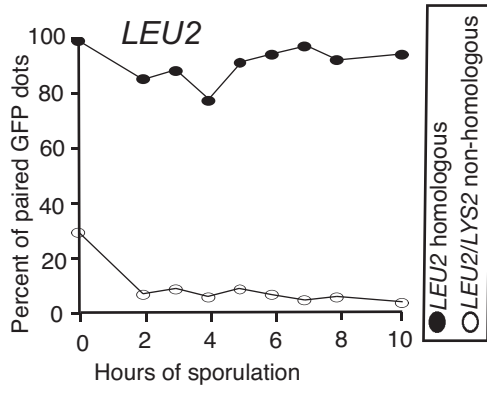

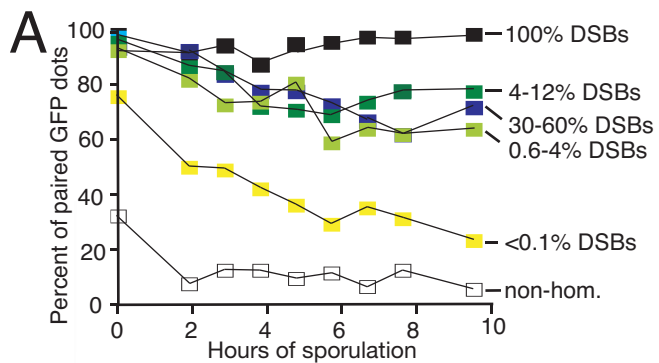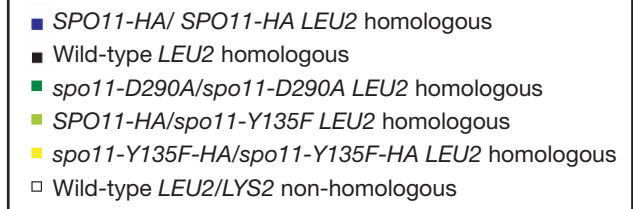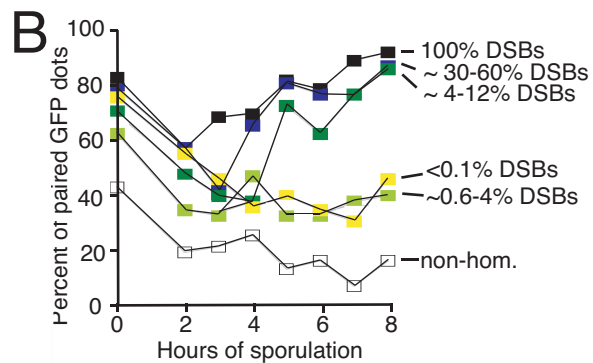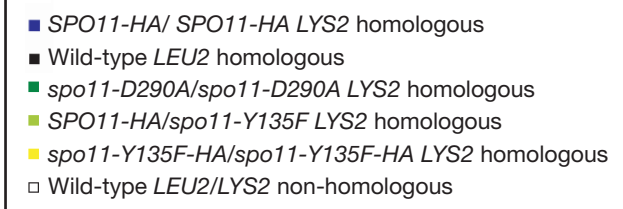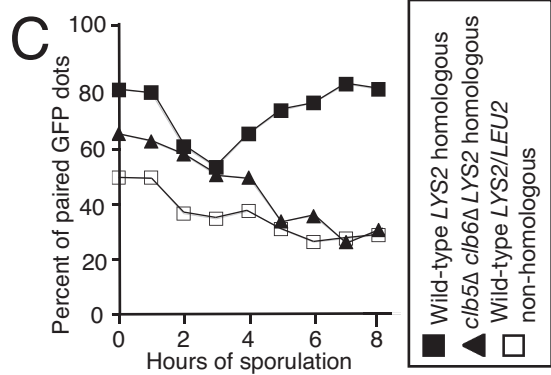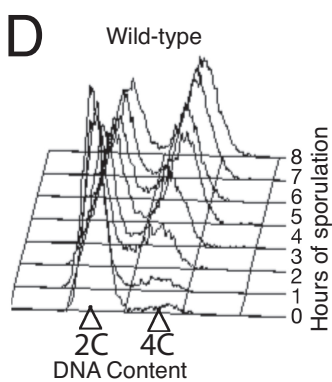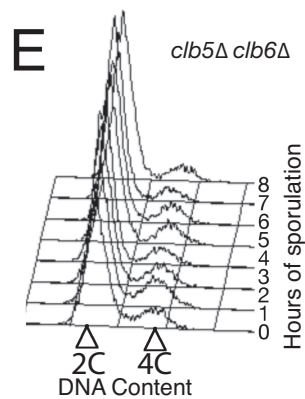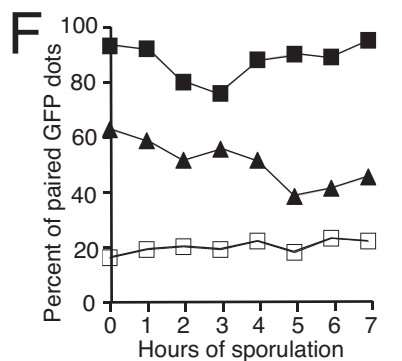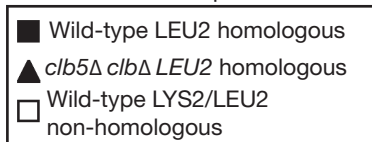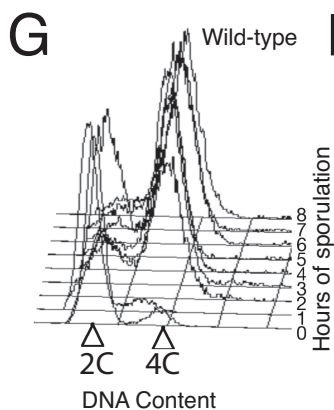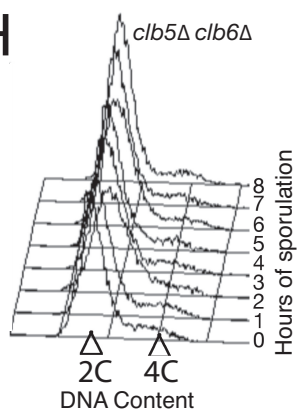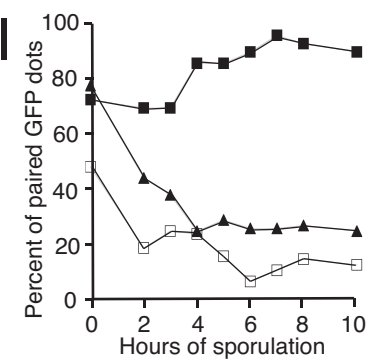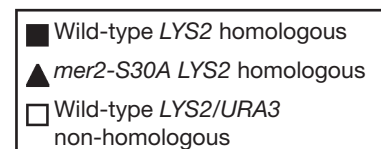

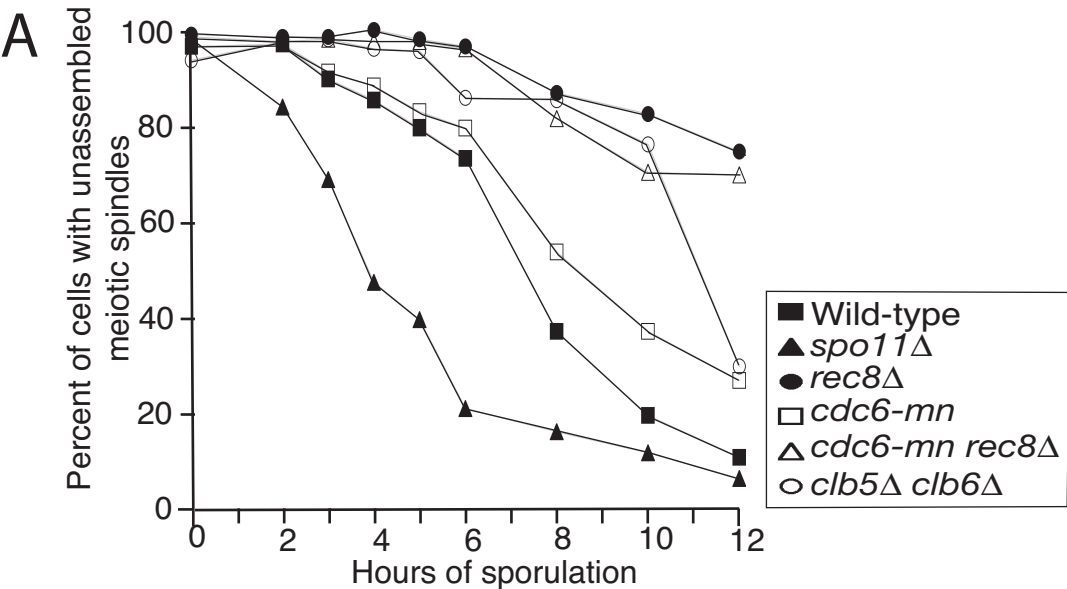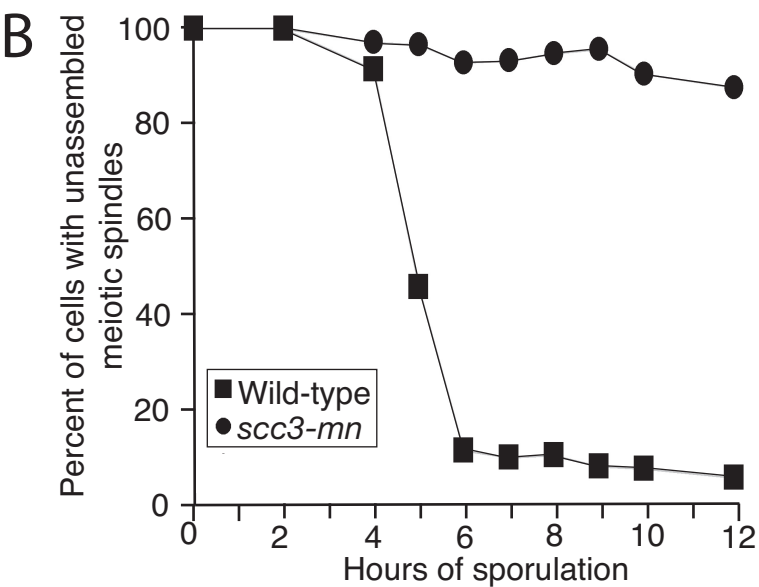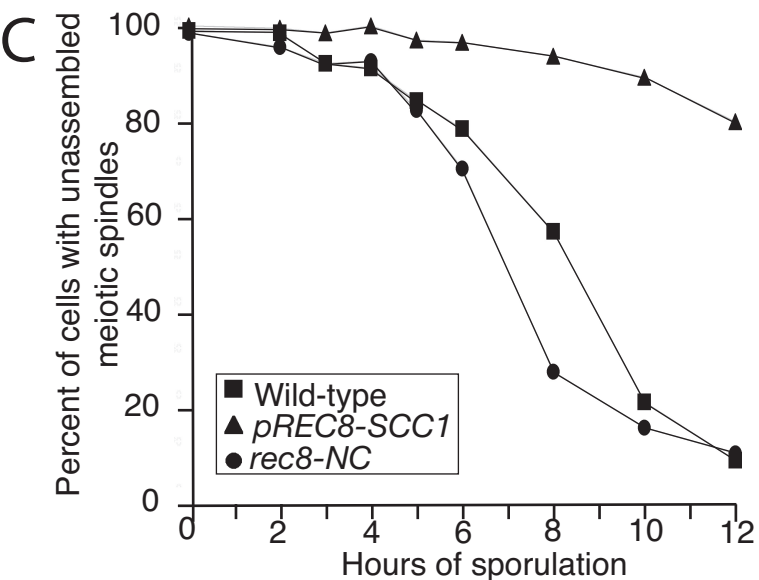



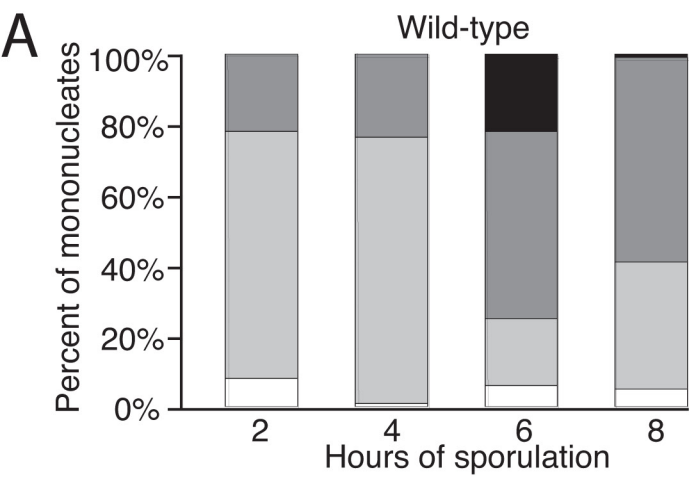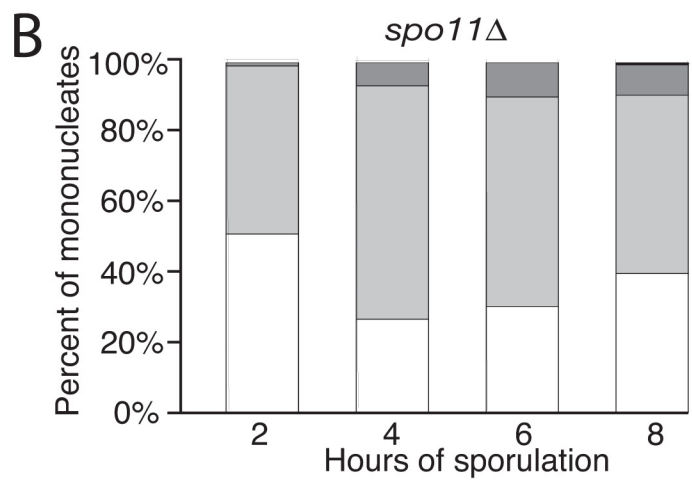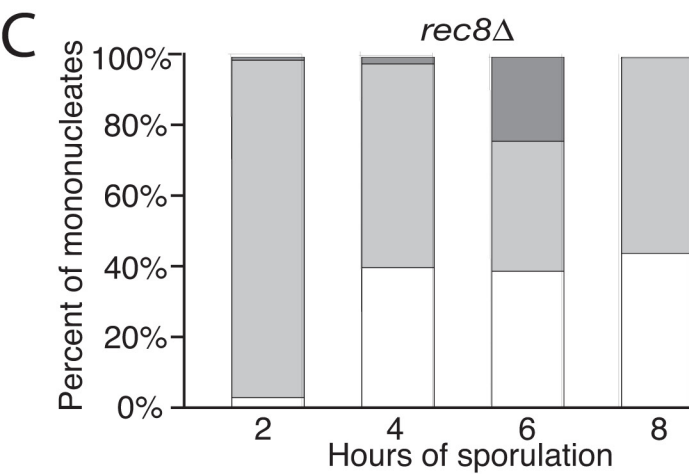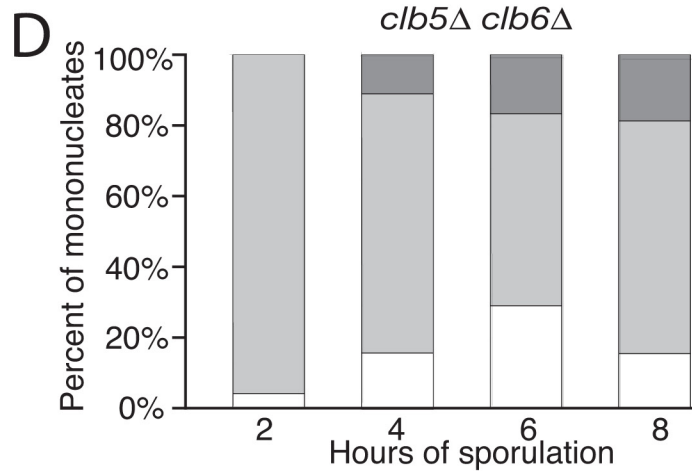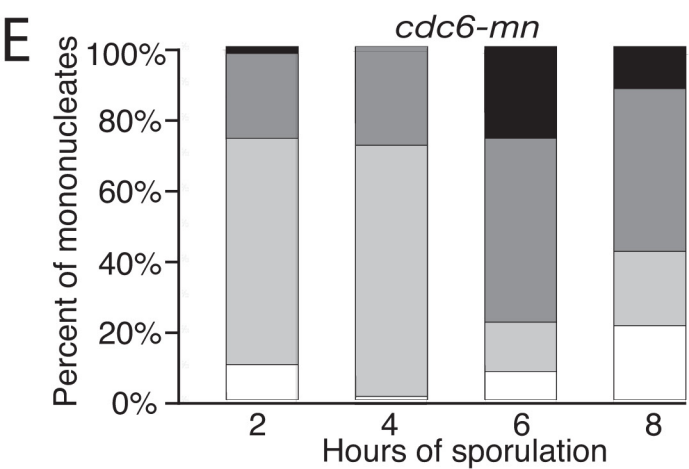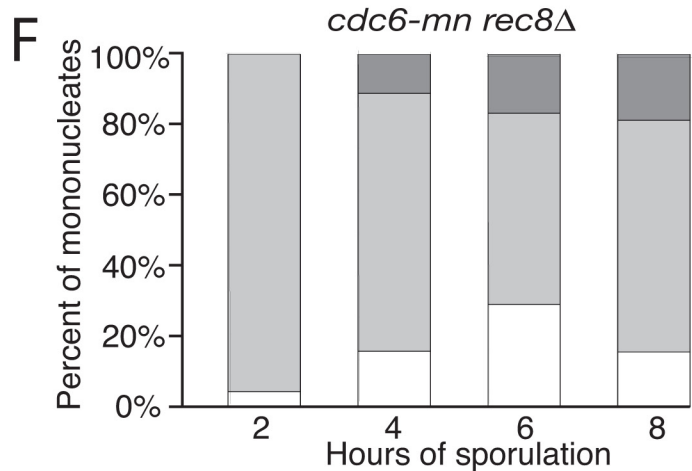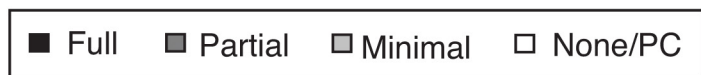

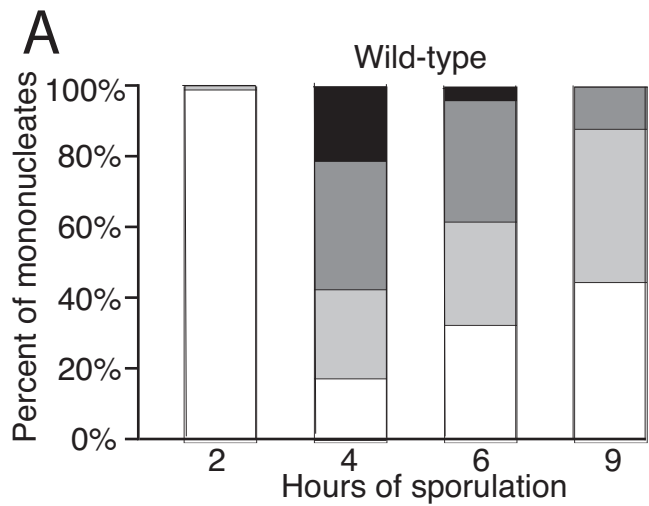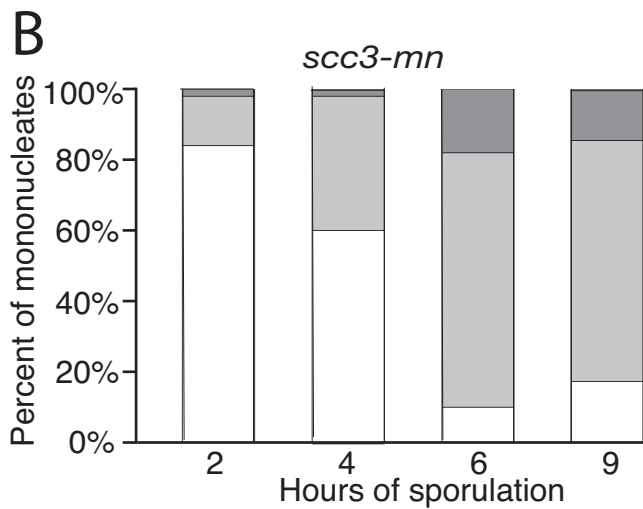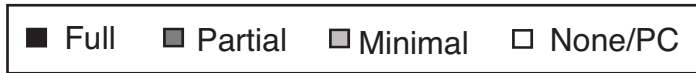

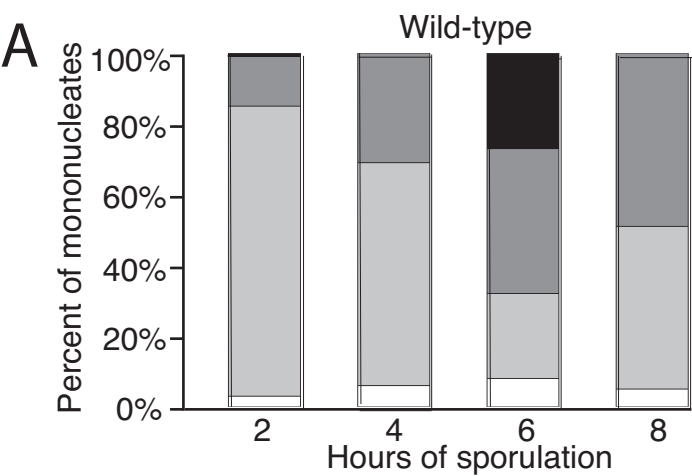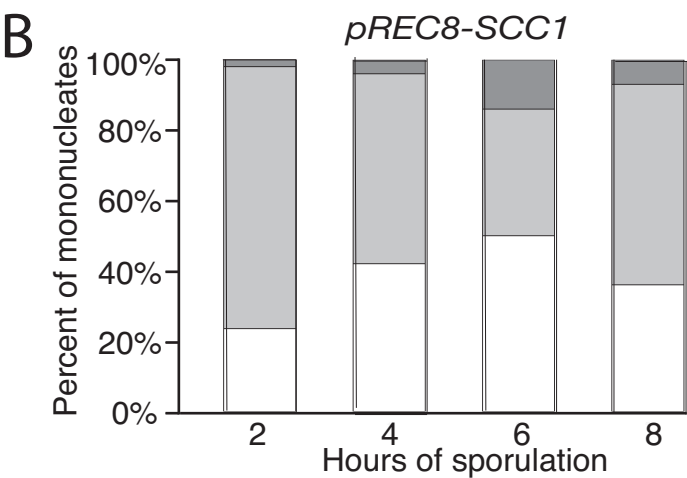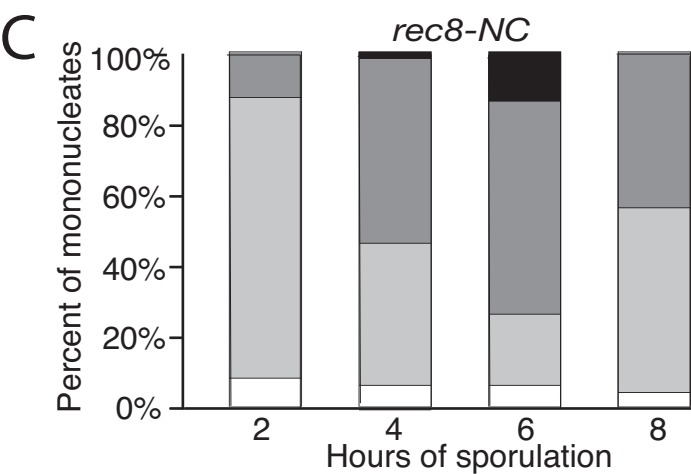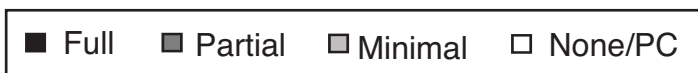

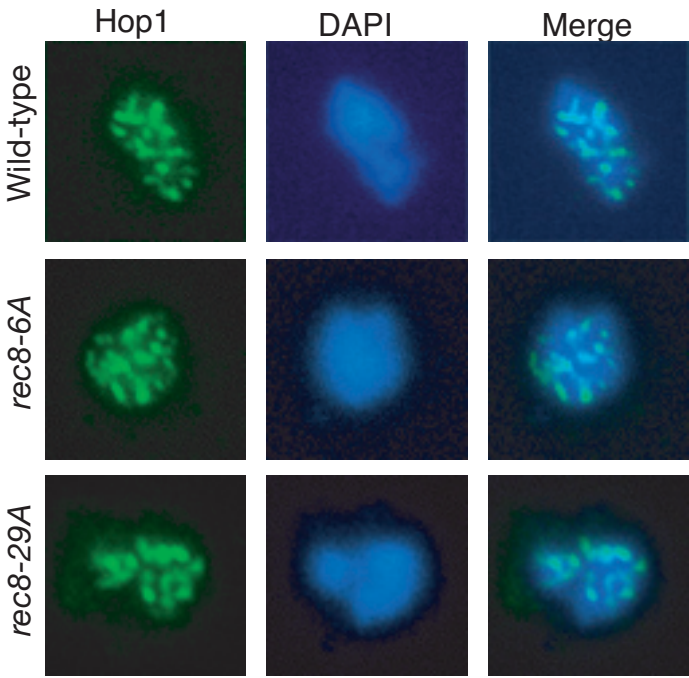

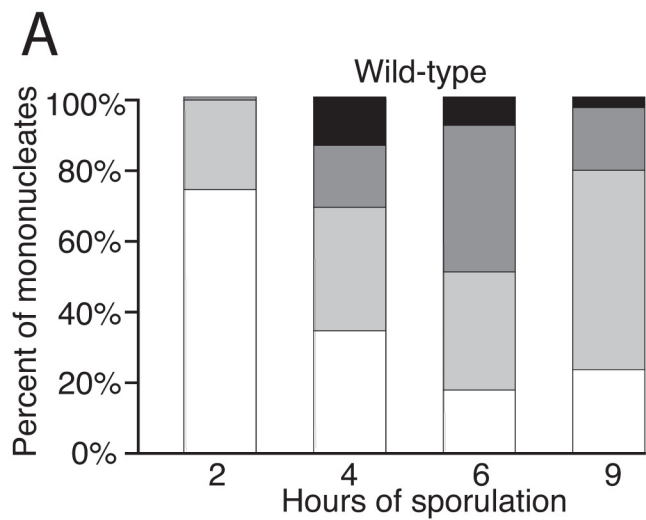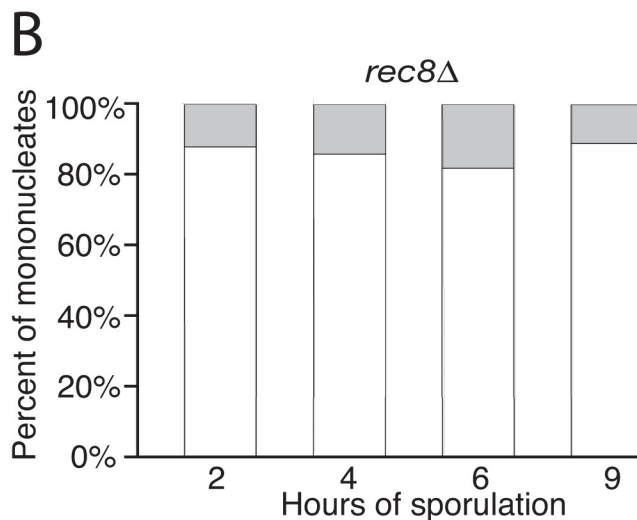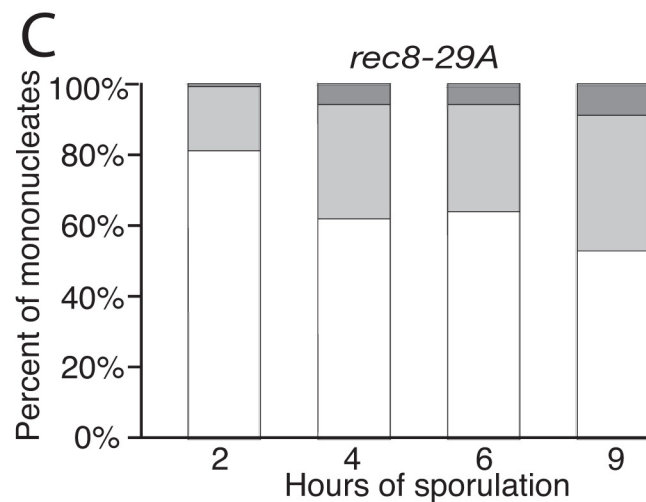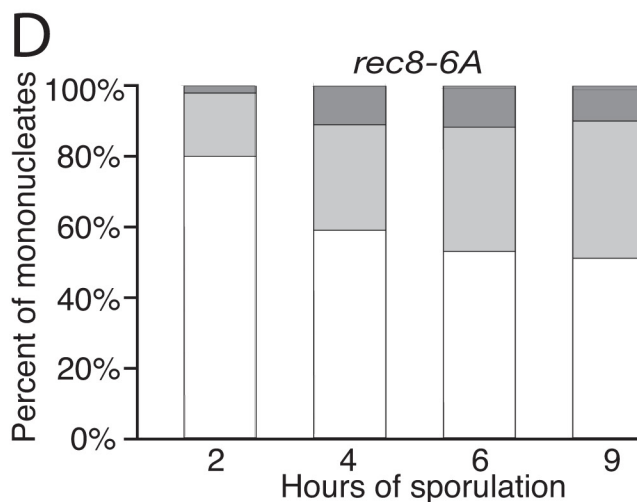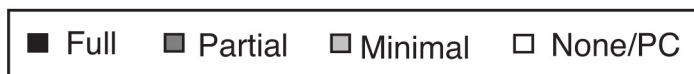

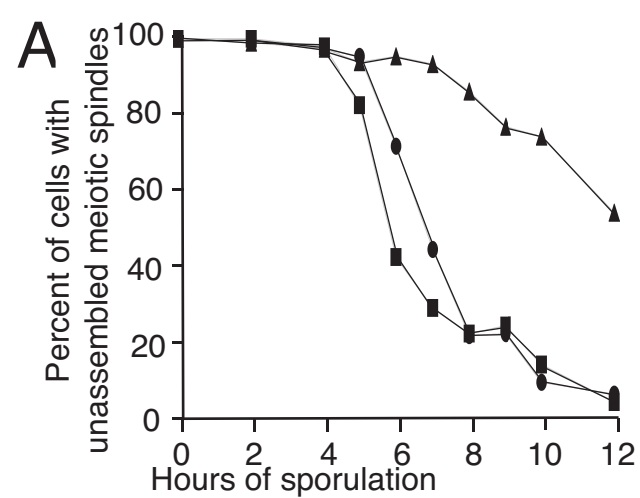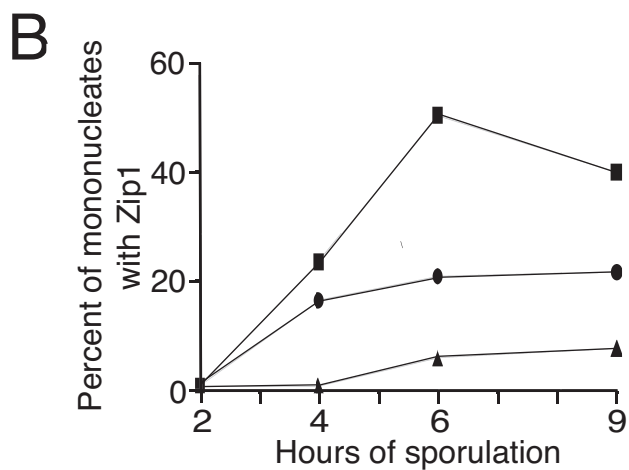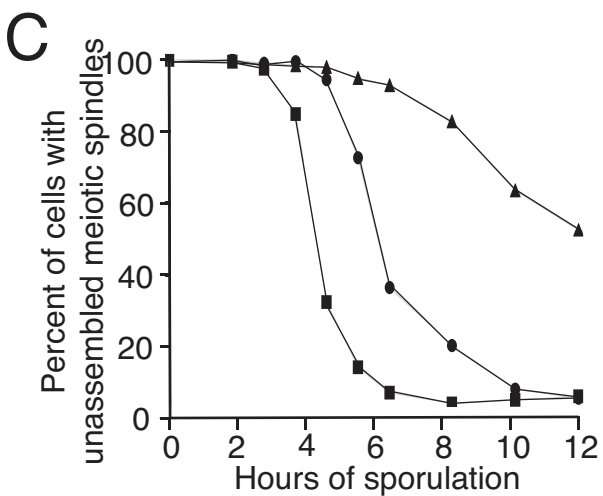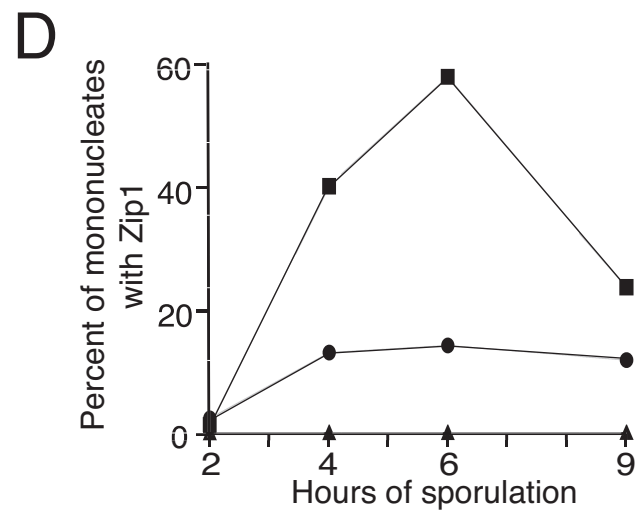

■ Wild-type ● *rec8-6A* ▲ *rec8Δ*

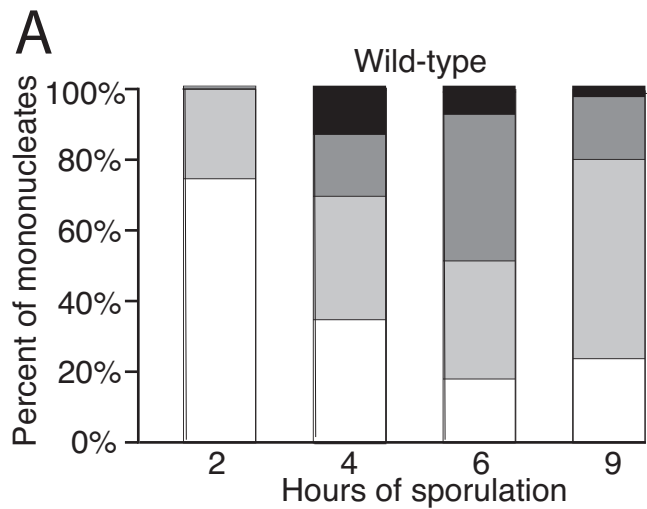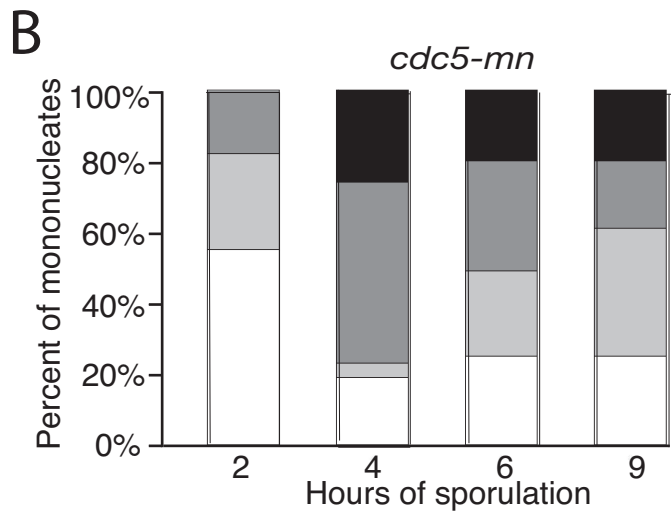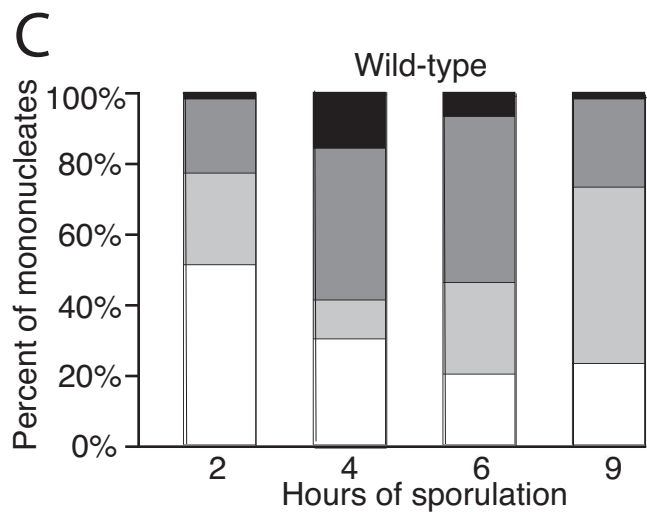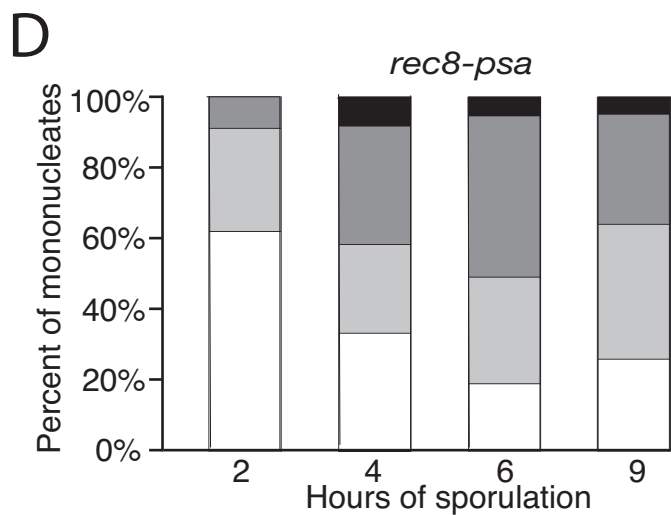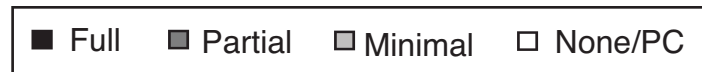

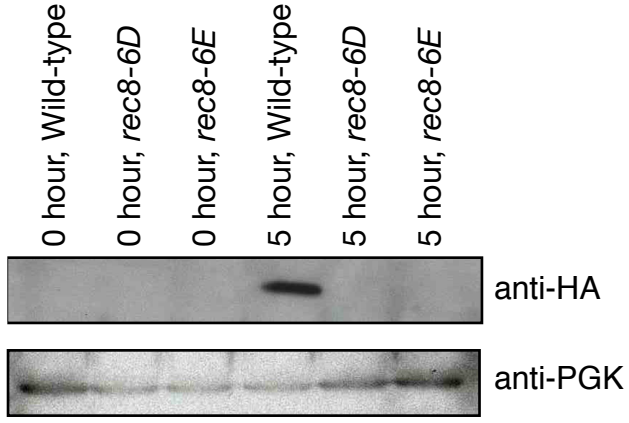

Supplement: E08-06-0637_1.pdf [file E08-06-0637_1.pdf]
